# Supplementary material
Source: ML conference proceedings conference paper supplement (https://proceedings.mlr.press/v139/yan21d.html)
Supplement: Supplementary file [file yan21d-supp.pdf]

---

# On Perceptual Lossy Compression: The Cost of Perceptual Reconstruction and An Optimal Training Framework

## Supplementary Material

---

This supplemental material first provides the proof of lemma and theorem 1, and then gives the derivation of equation (20). Finally, degeneration problem is discussed and we provide a pre-training trick to solve it.

### A. Proof of Lemma 1

Suppose  $\mathbf{B}^*$  is an optimal solution to (10), which satisfies  $\langle \mathbf{W}, \mathbf{B}^* \rangle \leq D$  and  $\sum_{i=1}^m b_{ij}^* = \sum_{i=1}^m b_{ji}^* = p(X = x_j), 1 \leq j \leq m$ . Since  $\Delta$  is symmetric,  $w_{ij} = \Delta(x_i, x_j) = \Delta(x_j, x_i) = w_{ji}$  holds for any  $1 \leq i, j \leq m$ , which means  $\mathbf{W} = \mathbf{W}^T$ . Thus, we have

$$\langle \mathbf{W}, \mathbf{B}^{*T} \rangle = \langle \mathbf{W}^T, \mathbf{B}^{*T} \rangle = \langle \mathbf{W}, \mathbf{B}^* \rangle \leq D. \quad (\text{A.1})$$

Denote the  $(i, j)$ -th element of  $\mathbf{B}^{*T}$  by  $b'_{ij}$ , it follows that  $b'_{ij} = b_{ji}^*$ , so that

$$\begin{aligned} \sum_{i=1}^m b'_{ij} &= \sum_{i=1}^m b_{ji}^* = p(X = x_j) \\ \sum_{i=1}^m b'_{ji} &= \sum_{i=1}^m b_{ij}^* = p(X = x_j). \end{aligned} \quad (\text{A.2})$$

Then, it is easy to see that  $\mathbf{B}^{*T}$  is also a feasible solution to (10). Meanwhile, it can be justified that  $\mathbf{B}^{*T}$  is also an optimal solution to (10) since the objective satisfies

$$\begin{aligned} G_{p_X}(\mathbf{B}^{*T}) &= 2H(X) + \sum_{i=1}^m \sum_{j=1}^m b'_{ij} \log b'_{ij} \\ &= 2H(X) + \sum_{i=1}^m \sum_{j=1}^m b_{ji}^* \log b_{ji}^* \\ &= G_{p_X}(\mathbf{B}^*). \end{aligned} \quad (\text{A.3})$$

Next, denote  $\mathbf{B}_0 := (\mathbf{B}^* + \mathbf{B}^{*T})/2$ , we show that  $G_{p_X}(\mathbf{B}_0) = G_{p_X}(\mathbf{B}^*)$ . First,  $\mathbf{B}_0$  is a feasible solution of (10) as it satisfies the constraints

$$\begin{aligned} \langle \mathbf{W}, \mathbf{B}_0 \rangle &= \left\langle \mathbf{W}^T, \frac{\mathbf{B}^* + \mathbf{B}^{*T}}{2} \right\rangle = \frac{\langle \mathbf{W}, \mathbf{B}^* \rangle + \langle \mathbf{W}, \mathbf{B}^{*T} \rangle}{2} \leq D \\ \sum_{i=1}^m b_{0ij} &= \sum_{i=1}^m \frac{b_{ij}^* + b'_{ij}}{2} = \frac{1}{2} \left( \sum_{i=1}^m b_{ij}^* + \sum_{i=1}^m b'_{ij} \right) = p(X = x_j) \\ \sum_{i=1}^m b_{0ji} &= \sum_{i=1}^m \frac{b_{ji}^* + b'_{ji}}{2} = \frac{1}{2} \left( \sum_{i=1}^m b_{ji}^* + \sum_{i=1}^m b'_{ji} \right) = p(X = x_j). \end{aligned} \quad (\text{A.4})$$

Meanwhile, the objective function  $G_{p_X}(\mathbf{B}_0)$  can be expressed as

$$\begin{aligned} G_{p_X}(\mathbf{B}_0) &= 2H(X) + \sum_{i=1}^m \sum_{j=1}^m b_{0ij} \log b_{0ij} \\ &= 2H(X) + \sum_{i=1}^m \sum_{j=1}^m \frac{b_{ij}^* + b'_{ij}}{2} \log \frac{b_{ij}^* + b'_{ij}}{2}. \end{aligned} \quad (\text{A.5})$$

Notice that the function  $f(x) = x \log x$  is strictly convex in  $(0, 1)$ . Thus we have

$$\frac{b_{ij}^* + b'_{ij}}{2} \log \frac{b_{ij}^* + b'_{ij}}{2} \leq \frac{1}{2} (b_{ij}^* \log b_{ij}^* + b'_{ij} \log b'_{ij}), \quad (\text{A.6})$$

where the equality holds if and only if  $b_{ij}^* = b'_{ij}$ . Then, it follows that

$$\begin{aligned} G_{p_X}(\mathbf{B}_0) &= 2H(X) + \sum_{i=1}^m \sum_{j=1}^m \frac{b_{ij}^* + b'_{ij}}{2} \log \frac{b_{ij}^* + b'_{ij}}{2} \\ &\leq \frac{1}{2} \left[ \left( 2H(X) + \sum_{i=1}^m \sum_{j=1}^m b_{ij}^* \log b_{ij}^* \right) + \left( 2H(X) + \sum_{i=1}^m \sum_{j=1}^m b'_{ij} \log b'_{ij} \right) \right] \\ &= \frac{1}{2} [G_{p_X}(\mathbf{B}^*) + G_{p_X}(\mathbf{B}^{*T})] = G_{p_X}(\mathbf{B}^*). \end{aligned} \quad (\text{A.7})$$

Recall that  $\mathbf{B}^*$  is an optimal solution, hence  $G_{p_X}(\mathbf{B}^*) \leq G_{p_X}(\mathbf{B}_0)$ , which together with (A.7) leads to  $G_{p_X}(\mathbf{B}_0) = G_{p_X}(\mathbf{B}^*)$ . Thus,  $\mathbf{B}_0$  is an optimal solution and for any  $1 \leq i, j \leq m$  we have

$$\frac{b_{ij}^* + b'_{ij}}{2} \log \frac{b_{ij}^* + b'_{ij}}{2} = \frac{1}{2} (b_{ij}^* \log b_{ij}^* + b'_{ij} \log b'_{ij}), \quad (\text{A.8})$$

Furthermore, since  $f(x) = x \log x$  is strictly convex in  $(0, 1)$ , we have  $b'_{ij} = b_{ij}^*$  for any  $1 \leq i, j \leq m$  and hence  $\mathbf{B}^* = \mathbf{B}^{*T}$ , which finally results in Lemma 1.

## B. Proof of Theorem 1

Let  $X$  be a memoryless stationary source,  $Y = (X_1, X_2, \dots, X_t)$  be a source sequence of length  $t$ ,  $L$  and  $Q$  be the encoder and decoder, respectively, with which the compressed representation is  $Z = L(Y)$  and the output of the encoder is  $\hat{Y} = Q(Z)$ . Since  $F_t(D, 0)$  defined in (15) is non-increasing on  $D$ , in the case of squared-error distortion, we consider its inverse form for convenience as

$$\begin{aligned} &\min_{L, Q} \frac{1}{t} \mathbb{E} \left[ \left\| Y - \hat{Y} \right\|^2 \right] \\ &s.t. \quad Z = L(Y), \hat{Y} = Q(Z), \\ &\quad H(Z) \leq tR, d(p_Y, p_{\hat{Y}}) \leq 0, \end{aligned} \quad (\text{B.1})$$

which minimizes the MSE distortion under constraints on the average bit-rate and distribution divergence (perception quality).

For convenience in the sequel analysis, we define the joint distribution matrix of  $Y$  and  $Z$  as  $\mathbf{L} \in \mathbb{R}^{m \times n}$  with the  $(i, j)$ -th element being  $l_{i,j} = p_{Y,Z}(y_i, z_j)$ . Similarly, we define the joint distribution matrix of  $\hat{Y}$  and  $Z$  as  $\mathbf{Q} \in \mathbb{R}^{m \times n}$  with the  $(i, j)$ -th element being  $q_{i,j} = p_{\hat{Y},Z}(y_i, z_j)$ . In fact,  $\mathbf{L}$  and  $\mathbf{Q}$  are the joint distribution matrices of the encoder and decoder, respectively.

Next we show that for any optimal encoder-decoder pair  $(L^*, Q^*)$  to (B.1) with joint distribution matrices  $(\mathbf{L}^*, \mathbf{Q}^*)$ , the encoder-decoder pairs with joint distribution matrices  $(\mathbf{L}^*, \mathbf{L}^*)$  and  $(\mathbf{Q}^*, \mathbf{Q}^*)$  are also optimal to (B.1).

First, for an optimal encoder-decoder pair  $(L^*, Q^*)$  to (B.1), we have  $H(L^*(Y)) \leq tR$ . Let the alphabet of  $Y$  be  $\{y_1, y_2, \dots, y_m\}$  and the alphabet of  $Z$  be  $\{z_1, z_2, \dots, z_n\}$ , and suppose that  $p(L^*(Y) = z_j) = h_j, 1 \leq j \leq n$ . Then we consider the following formulation

$$\begin{aligned} & \min_{L, Q} \frac{1}{t} \mathbb{E}[\|Y - \hat{Y}\|^2] \\ & \text{s.t. } Z = L(Y), \hat{Y} = Q(Z), d(p_Y, p_{\hat{Y}}) \leq 0, \\ & \quad p_Z(z_j) = h_j, 1 \leq j \leq n. \end{aligned} \tag{B.2}$$

It is easy to see that the feasible region of problem (B.2) is a subset of the feasible region of problem (B.1) and  $(L^*, Q^*)$  is optimal to both (B.1) and (B.2). Thus any optimal solution of problem (B.2) must be an optimal solution of problem (B.1). Therefore, to justify that the encoder-decoder pairs with joint distribution matrices  $(\mathbf{L}^*, \mathbf{L}^*)$  and  $(\mathbf{Q}^*, \mathbf{Q}^*)$  are optimal to (B.1), it is enough to justify that  $(\mathbf{L}^*, \mathbf{L}^*)$  and  $(\mathbf{Q}^*, \mathbf{Q}^*)$  are optimal to (B.2).

Obviously, the constraint  $p_Z(z_j) = h_j$  in (B.2) can be expressed as  $\sum_i l_{i,j} = \sum_i q_{i,j} = h_j$ . Besides, since  $Y$  and  $\hat{Y}$  have the same distribution under perfect perception constraint, the constraint  $d(p_Y, p_{\hat{Y}}) \leq 0$  can be expressed as  $\sum_j l_{i,j} = \sum_j q_{i,j} = p_Y(y_i)$ . Now, we rewrite the objective function of (B.2) as

$$\begin{aligned} \frac{1}{t} \mathbb{E}[\|Y - \hat{Y}\|^2] &= \frac{1}{t} \sum_{y, \hat{y}} p_{Y, \hat{Y}}(y, \hat{y}) \|y - \hat{y}\|^2 \\ &= \frac{1}{t} \left[ \sum_y p_Y(y) y^T y + \sum_{\hat{y}} p_{\hat{Y}}(\hat{y}) \hat{y}^T \hat{y} - 2 \sum_{y, \hat{y}} p_{Y, \hat{Y}}(y, \hat{y}) y^T \hat{y} \right], \end{aligned} \tag{B.3}$$

where  $\sum_y p_Y(y) y^T y$  is constant for fixed source, and  $\sum_{\hat{y}} p_{\hat{Y}}(\hat{y}) \hat{y}^T \hat{y} = \sum_y p_Y(y) y^T y$  for the perfect perception constraint. Hence, minimizing the objective function of (B.2) is to equivalent to maximizing  $\sum_{y, \hat{y}} p_{Y, \hat{Y}}(y, \hat{y}) y^T \hat{y}$ , for which we have

$$\begin{aligned} \sum_{y, \hat{y}} p_{Y, \hat{Y}}(y, \hat{y}) y^T \hat{y} &= \sum_{y, \hat{y}, z} p_{Y, \hat{Y}, Z}(y, \hat{y}, z) y^T \hat{y} \\ &\stackrel{(a)}{=} \sum_{y, \hat{y}, z} p_Z(z) p_{Y|Z}(y|z) p_{\hat{Y}|Z}(\hat{y}|z) y^T \hat{y} \\ &= \sum_j h_j \left[ \sum_i p_{Y|Z}(y_i|z_j) y_i^T \sum_k p_{\hat{Y}|Z}(\hat{y}_k|z_j) \hat{y}_k \right] \\ &= \sum_j h_j \mathbb{E}(Y|Z = z_j)^T \mathbb{E}(\hat{Y}|Z = z_j) \end{aligned} \tag{B.4}$$

where in (a) we used the property of Markov chain  $Y \rightarrow Z \rightarrow \hat{Y}$  that  $Y$  and  $\hat{Y}$  are independent under condition  $Z$ . Hence, using the joint distribution representation  $(\mathbf{L}, \mathbf{Q})$  of the encoder-decoder pair  $(L, Q)$ , the problem (B.2) can be equivalently reformulated as

$$\begin{aligned} & \max_{\mathbf{L}, \mathbf{Q}} \sum_j h_j \mathbb{E}(Y|Z = z_j)^T \mathbb{E}(\hat{Y}|Z = z_j) \\ & \text{s.t. } \sum_i l_{i,j} = \sum_i q_{i,j} = h_j, 1 \leq j \leq n \\ & \quad \sum_j l_{i,j} = \sum_j q_{i,j} = p_Y(y_i), 1 \leq i \leq m \\ & \quad 0 \leq l_{i,j}, q_{i,j} \leq 1, 1 \leq i \leq m, 1 \leq j \leq n. \end{aligned} \tag{B.5}$$

Accordingly, the joint distribution matrix pair  $(\mathbf{L}^*, \mathbf{Q}^*)$  corresponding to the optimal encoder-decoder pair  $(L^*, Q^*)$  is an optimal solution to (B.5). Recall that  $\mathbf{L}$  is the probability matrix of  $p_{Y,Z}$  and  $\mathbf{Q}$  is the probability matrix of  $p_{\hat{Y},Z}$ , hence

$\mathbb{E}(Y|Z = z_j)$  and  $\mathbb{E}(\hat{Y}|Z = z_j)$  are functions of  $\mathbf{L}$  and  $\mathbf{Q}$ . Define

$$f_j(\mathbf{L}) := \mathbb{E}(Y|Z = z_j) = \sum_i \frac{l_{i,j}}{h_j} y_i, \quad (\text{B.6})$$

$$f_j(\mathbf{Q}) := \mathbb{E}(\hat{Y}|Z = z_j) = \sum_i \frac{q_{i,j}}{h_j} y_i, \quad (\text{B.7})$$

and

$$\begin{aligned} F(\mathbf{L}, \mathbf{Q}) &:= \sum_j h_j \mathbb{E}(Y|Z = z_j)^T \mathbb{E}(\hat{Y}|Z = z_j) \\ &= \sum_j h_j f_j(\mathbf{L})^T f_j(\mathbf{Q}). \end{aligned} \quad (\text{B.8})$$

Next, we show  $(\mathbf{L}^*, \mathbf{L}^*)$  and  $(\mathbf{Q}^*, \mathbf{Q}^*)$  are also optimal solutions to (B.5).

Because  $(\mathbf{L}^*, \mathbf{Q}^*)$  is an optimal solution to (B.5), the optimal objective value of (B.5) is  $F(\mathbf{L}^*, \mathbf{Q}^*)$ . Since the constraints of  $\mathbf{L}$  and  $\mathbf{Q}$  are the same, it is easy to see that  $(\mathbf{L}^*, \mathbf{L}^*)$  and  $(\mathbf{Q}^*, \mathbf{Q}^*)$  are both feasible solutions to (B.5). Meanwhile, we have

$$F(\mathbf{L}^*, \mathbf{L}^*) = \sum_j h_j f_j(\mathbf{L}^*)^T f_j(\mathbf{L}^*) = \sum_j h_j \|f_j(\mathbf{L}^*)\|^2, \quad (\text{B.9})$$

$$F(\mathbf{Q}^*, \mathbf{Q}^*) = \sum_j h_j f_j(\mathbf{Q}^*)^T f_j(\mathbf{Q}^*) = \sum_j h_j \|f_j(\mathbf{Q}^*)\|^2. \quad (\text{B.10})$$

Summing up (B.9) and (B.10) yields

$$\begin{aligned} F(\mathbf{L}^*, \mathbf{L}^*) + F(\mathbf{Q}^*, \mathbf{Q}^*) &= \sum_j h_j \left( \|f_j(\mathbf{L}^*)\|^2 + \|f_j(\mathbf{Q}^*)\|^2 \right) \\ &\geq 2 \sum_j h_j \|f_j(\mathbf{L}^*)\| \|f_j(\mathbf{Q}^*)\| \\ &\stackrel{(b)}{\geq} 2 \sum_j h_j |f_j(\mathbf{L}^*)^T f_j(\mathbf{Q}^*)| \\ &\stackrel{(c)}{\geq} 2 \sum_j h_j f_j(\mathbf{L}^*)^T f_j(\mathbf{Q}^*) \\ &= 2F(\mathbf{L}^*, \mathbf{Q}^*), \end{aligned} \quad (\text{B.11})$$

where in (b) we used the Cauchy inequality and (c) is due to the non-negativity of  $h_j$ . Since  $(\mathbf{L}^*, \mathbf{Q}^*)$  is an optimal solution to (B.5),  $F(\mathbf{L}^*, \mathbf{Q}^*) \geq F(\mathbf{L}, \mathbf{Q})$  holds for any  $(\mathbf{L}, \mathbf{Q})$  under the constraint of (B.5), which together with (B.11) implies  $F(\mathbf{L}^*, \mathbf{L}^*) = F(\mathbf{Q}^*, \mathbf{Q}^*) = F(\mathbf{L}^*, \mathbf{Q}^*)$ . Therefore,  $(\mathbf{L}^*, \mathbf{L}^*)$  and  $(\mathbf{Q}^*, \mathbf{Q}^*)$  are also optimal solutions to (B.5).

Thus, for any source length  $t$ , there exist optimal solutions to (B.5) satisfying

$$p_{Y,Z} = p_{\hat{Y},Z}, \quad p_{Y|Z} = p_{\hat{Y}|Z}, \quad (\text{B.12})$$

which finally results in Theorem 1.

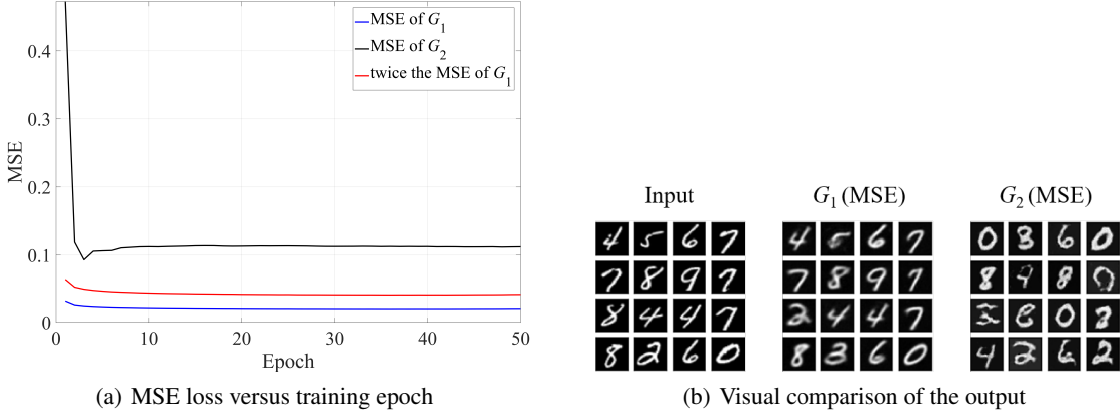

Figure 1. Illustration of a typical degeneration case.

### C. Derivation of equation (20)

Equation (20) can be straightforwardly derived as

$$\begin{aligned}
 \frac{1}{t} \mathbb{E}[\|Y - \hat{Y}\|^2] &= \sum_{y, \hat{y}} p_{Y, \hat{Y}}(y, \hat{y}) \|y - \hat{y}\|^2 \\
 &\stackrel{(d)}{=} \frac{1}{t} \sum_{y, \hat{y}, z} p_{Y, \hat{Y}, Z}(y, \hat{y}, z) \|y - \mathbb{E}[Y|z] + \mathbb{E}[\hat{Y}|z] - \hat{y}\|^2 \\
 &\stackrel{(e)}{=} \frac{1}{t} \sum_{y, z} p_{Y, Z}(y, z) \|y - \mathbb{E}[Y|z]\|^2 + \frac{1}{t} \sum_{\hat{y}, z} p_{\hat{Y}, Z}(\hat{y}, z) \|\mathbb{E}[\hat{Y}|z] - \hat{y}\|^2 \\
 &\stackrel{(f)}{=} \frac{2}{t} \mathbb{E}[\|Y - \mathbb{E}[Y|Z]\|^2 | Z],
 \end{aligned} \tag{C.1}$$

where (d) is due to  $\mathbb{E}[Y|Z] = \mathbb{E}[\hat{Y}|Z]$ , (e) is due to

$$\begin{aligned}
 \sum_y p_{Y|Z}(y|z)(y - \mathbb{E}[Y|Z]) &= \sum_y p_{Y|Z}(y|z)y - \mathbb{E}[Y|Z] \\
 &= \mathbb{E}[Y|Z] - \mathbb{E}[Y|Z] = 0
 \end{aligned} \tag{C.2}$$

$$\begin{aligned}
 \sum_{\hat{y}} p_{\hat{Y}|Z}(\hat{y}|z)(\hat{y} - \mathbb{E}[\hat{Y}|Z]) &= \sum_{\hat{y}} p_{\hat{Y}|Z}(\hat{y}|z)\hat{y} - \mathbb{E}[\hat{Y}|Z] \\
 &= \mathbb{E}[\hat{Y}|Z] - \mathbb{E}[\hat{Y}|Z] = 0
 \end{aligned} \tag{C.3}$$

and (f) is due to the same distribution of  $Y$  and  $\hat{Y}$ .

### D. Degenerate problem

Figure 1 shows a degeneration case in training  $G_2$ , where the MSE of  $G_2$  converges to a value deviates largely from the 2-fold MSE of  $G_1$ . From Fig. 7(b), while the output numbers of  $G_1$  are correct, those of  $G_2$  are incorrect though more clear. It means that the bit stream from  $E$  contains enough information for correctly reconstructing the numbers, but the trained model  $G_2$  tends to generate numbers randomly. This problem is typically encountered in adversarial training, due to that the alternating training procedure converges to a poor point. To address this problem, we pre-train the discriminator  $J$  to discriminate between  $(x_i, E(x_i))$  and  $(x_j, E(x_i))$  with  $i \neq j$ , where  $x_i$  and  $x_j$  are samples of  $X$ . Intensive experiments show that this strategy can effectively reduce the occurrence of the degeneration problem.
